# Supplementary material for: External validation of the improving partial risk adjustment in surgery (PRAIS-2) model for 30-day mortality after paediatric cardiac surgery
Source: HighWire-hosted journal article supplement (doi:10.1136/bmjopen-2020-039236), 2020-11-01
Supplement: bmjopen-2020-039236supp006_data_supplement.pdf [file bmjopen-2020-039236supp006_data_supplement.pdf]

**6a. Hosmer and Lemeshow goodness of fit groups, external validation cohort 2**

| PRAIS2 categories  | Predicted survival | Predicted mortality | Observed survival | Observed mortality |
|--------------------|--------------------|---------------------|-------------------|--------------------|
| [0.000131,0.00126] | 119.93             | 0.07                | 120.00            | 0.00               |
| (0.00126,0.00277]  | 119.76             | 0.24                | 120.00            | 0.00               |
| (0.00277,0.00496]  | 118.54             | 0.46                | 119.00            | 0.00               |
| (0.00496,0.0071]   | 119.28             | 0.72                | 120.00            | 0.00               |
| (0.0071,0.0101]    | 118.97             | 1.03                | 119.00            | 1.00               |
| (0.0101,0.0145]    | 117.59             | 1.41                | 118.00            | 1.00               |
| (0.0145,0.0206]    | 117.94             | 2.06                | 120.00            | 0.00               |
| (0.0206,0.0338]    | 115.78             | 3.22                | 114.00            | 5.00               |
| (0.0338,0.0743]    | 114.04             | 5.96                | 117.00            | 3.00               |
| (0.0743,0.408]     | 102.32             | 17.68               | 107.00            | 13.00              |

**Supplementary Table 6b Hosmer and Lemeshow goodness of fit groups, external validation cohort 1**

| PRAIS2 categories   | Predicted survival | Predicted mortality | Observed survival | Observed mortality |
|---------------------|--------------------|---------------------|-------------------|--------------------|
| [3.61e-05,0.000938] | 135.94             | 0.06                | 136.00            | 0.00               |
| (0.000938,0.00249]  | 134.77             | 0.23                | 134.00            | 1.00               |
| (0.00249,0.00482]   | 134.51             | 0.49                | 135.00            | 0.00               |
| (0.00482,0.00803]   | 134.12             | 0.88                | 133.00            | 2.00               |
| (0.00803,0.0115]    | 133.69             | 1.31                | 131.00            | 4.00               |
| (0.0115,0.0163]     | 133.16             | 1.84                | 133.00            | 2.00               |
| (0.0163,0.0221]     | 132.46             | 2.54                | 133.00            | 2.00               |
| (0.0221,0.0305]     | 131.49             | 3.51                | 128.00            | 7.00               |
| (0.0305,0.046]      | 130.01             | 4.99                | 127.00            | 8.00               |
| (0.046,0.256]       | 124.00             | 12.00               | 130.00            | 6.00               |

**6c. Hosmer and Lemeshow goodness of fit groups, overlapping cohorts**

| PRAIS2 categories   | Predicted survival | Predicted mortality | Observed survival | Observed mortality |
|---------------------|--------------------|---------------------|-------------------|--------------------|
| [4.29e-05,0.000909] | 182.92             | 0.08                | 183.00            | 0.00               |
| (0.000909,0.00234]  | 181.72             | 0.28                | 181.00            | 1.00               |
| (0.00234,0.0045]    | 181.39             | 0.61                | 180.00            | 2.00               |
| (0.0045,0.00754]    | 181.91             | 1.09                | 181.00            | 2.00               |
| (0.00754,0.0108]    | 180.35             | 1.65                | 181.00            | 1.00               |
| (0.0108,0.0159]     | 179.61             | 2.39                | 178.00            | 4.00               |
| (0.0159,0.0229]     | 179.48             | 3.52                | 182.00            | 1.00               |
| (0.0229,0.0327]     | 177.03             | 4.97                | 176.00            | 6.00               |
| (0.0327,0.0539]     | 174.60             | 7.40                | 171.00            | 11.00              |
| (0.0539,0.351]      | 164.34             | 18.66               | 155.00            | 28.00              |

**6d. Hosmer and Lemeshow goodness of fit groups, in non-elective subset**

| PRAIS2 categories | Predicted survival | Predicted mortality | Observed survival | Observed mortality |
|-------------------|--------------------|---------------------|-------------------|--------------------|
| [0.00109,0.00594] | 48.82              | 0.18                | 49.00             | 0.00               |
| (0.00594,0.00947] | 47.64              | 0.36                | 48.00             | 0.00               |
| (0.00947,0.0138]  | 47.46              | 0.54                | 47.00             | 1.00               |

|                 |       |       |       |       |
|-----------------|-------|-------|-------|-------|
| (0.0138,0.0201] | 47.20 | 0.80  | 48.00 | 0.00  |
| (0.0201,0.0287] | 47.80 | 1.20  | 47.00 | 2.00  |
| (0.0287,0.0384] | 46.44 | 1.56  | 44.00 | 4.00  |
| (0.0384,0.0546] | 45.83 | 2.17  | 46.00 | 2.00  |
| (0.0546,0.0818] | 44.71 | 3.29  | 47.00 | 1.00  |
| (0.0818,0.126]  | 43.02 | 4.98  | 46.00 | 2.00  |
| (0.126,0.408]   | 38.42 | 10.58 | 39.00 | 10.00 |
